# Supplementary material
Source: PubMed Central journal article supplement (PMC5612410)
Supplement: NIHMS900905-supplement-Supplemental_Material.pdf [file NIHMS900905-supplement-Supplemental_Material.pdf]

## SUPPLEMENTAL MATERIAL

### **Heart failure related hyper-phosphorylation in the cardiac troponin I C-terminus has divergent effects on cardiac function *in vivo***

Yuejin Li<sup>1</sup>, MD, PhD, FAHA, Guangshuo Zhu<sup>2</sup>, MD, Nazareno Paolocci<sup>2</sup>, MD, Pingbo Zhang, PhD<sup>4</sup>, Cyrus Takahashi<sup>2</sup>, Nazli Okumus<sup>1-5</sup>, Amir Heravi<sup>1</sup>, Gizem Keceli<sup>2</sup>, PhD, Genaro Ramirez-Correa<sup>1</sup>, MD, PhD, FAHA, David A Kass<sup>2,3</sup>, MD, Anne M Murphy<sup>1</sup>, MD, FAHA

<sup>1</sup>Department of Pediatrics/Division of Cardiology, <sup>2</sup>Department of Medicine/Division of Cardiology, <sup>3</sup>Department of Pharmacology and Molecular Sciences, Department of Biomedical Engineering, <sup>4</sup>Department of Ophthalmology, Johns Hopkins University, Baltimore, MD, <sup>5</sup>Istanbul Faculty of Medicine, Istanbul, Turkey

First Author's surname and short title: Li, *in vivo* effect of cTnI C-terminus phosphorylation

Correspondence: Anne M. Murphy

720 Rutland Ave. Ross Bldg, Rm 1144

Baltimore, 21205

Fax: 410-614-0699

Tel: 410-614-0703

Email: [murphy@jhmi.edu](mailto:murphy@jhmi.edu)

## Figures and legends

### Supplemental Figure 1.

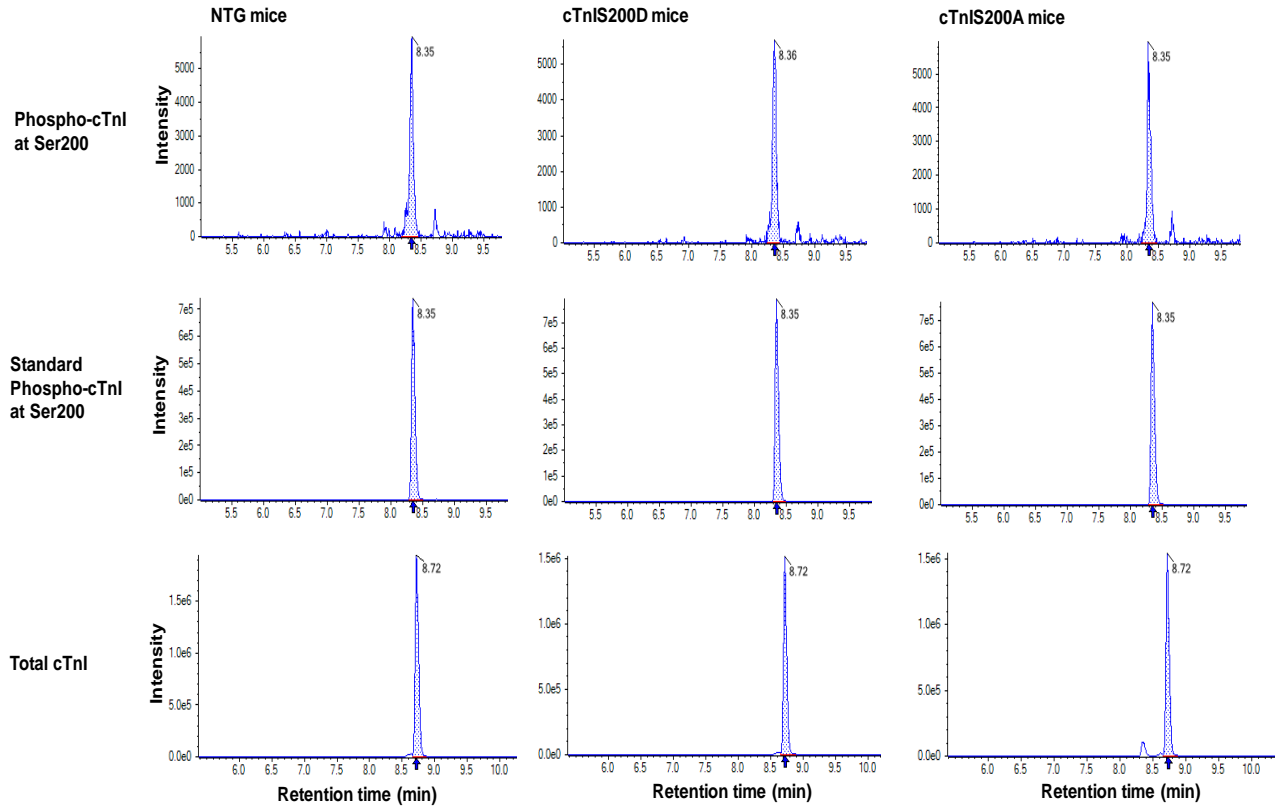

**Supplemental Figure 1.** Mass chromatograph of mouse cTnI. The retention time of the peptide fragment of cTnI containing phosphorylated Ser200, NIDAL(p)SGMEGR, is 8.35 minutes. Its representative transitions from NTG, cTnIS200D, and cTnIS200A are listed in the top row. An internal standard peptide NIDAL(p)SGMEGR\* was used as positive control; its representative transitions are listed in the middle row. The peptide for total cTnI is NITEIADLTQK whose retention time is 8.71 minutes, representative transitions are list in the bottom row.

**Supplemental Figure 2.**

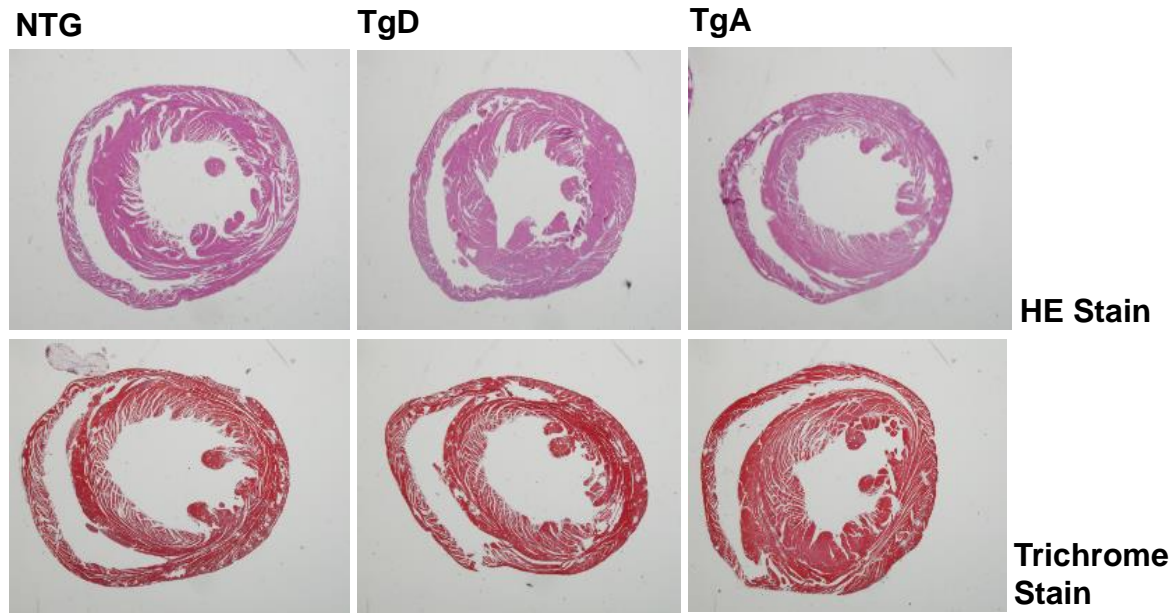

**Supplemental Figure 2.** Histological examination of cardiac structure. Hematoxylin and eosin (HE) stain showed no myocardium hypertrophy or chamber dilation in either type of transgenic hearts. No fibrosis was detected by trichrome stain.

Supplemental Figure 3.

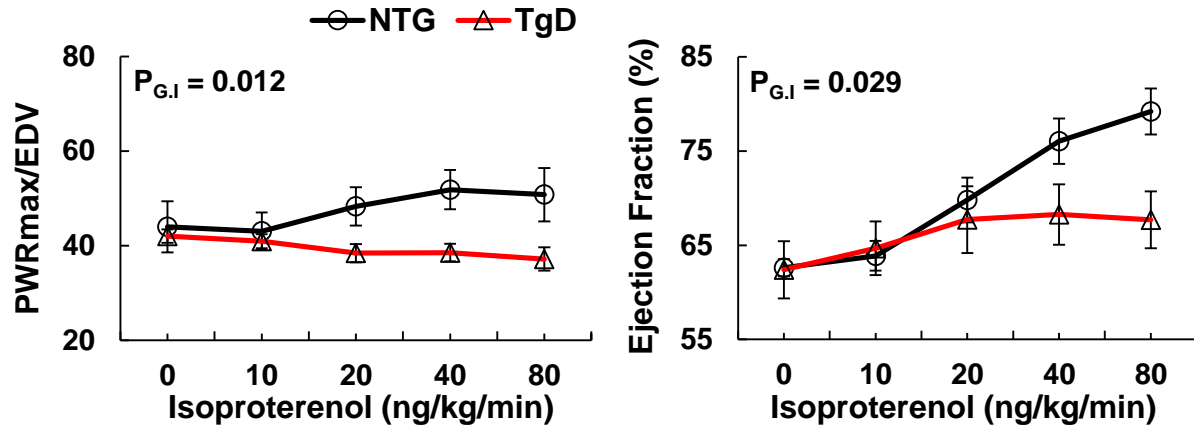

**Supplemental Figure 3.** Cardiac responses to  $\beta$ -adrenergic stimulation with isoproterenol at fixed heart rate.  $n=4$ .  $P_{G.I}<0.05$  indicates significance among the interactions between genotype and the concentration of isoproterenol.

**Supplemental Figure 4.**

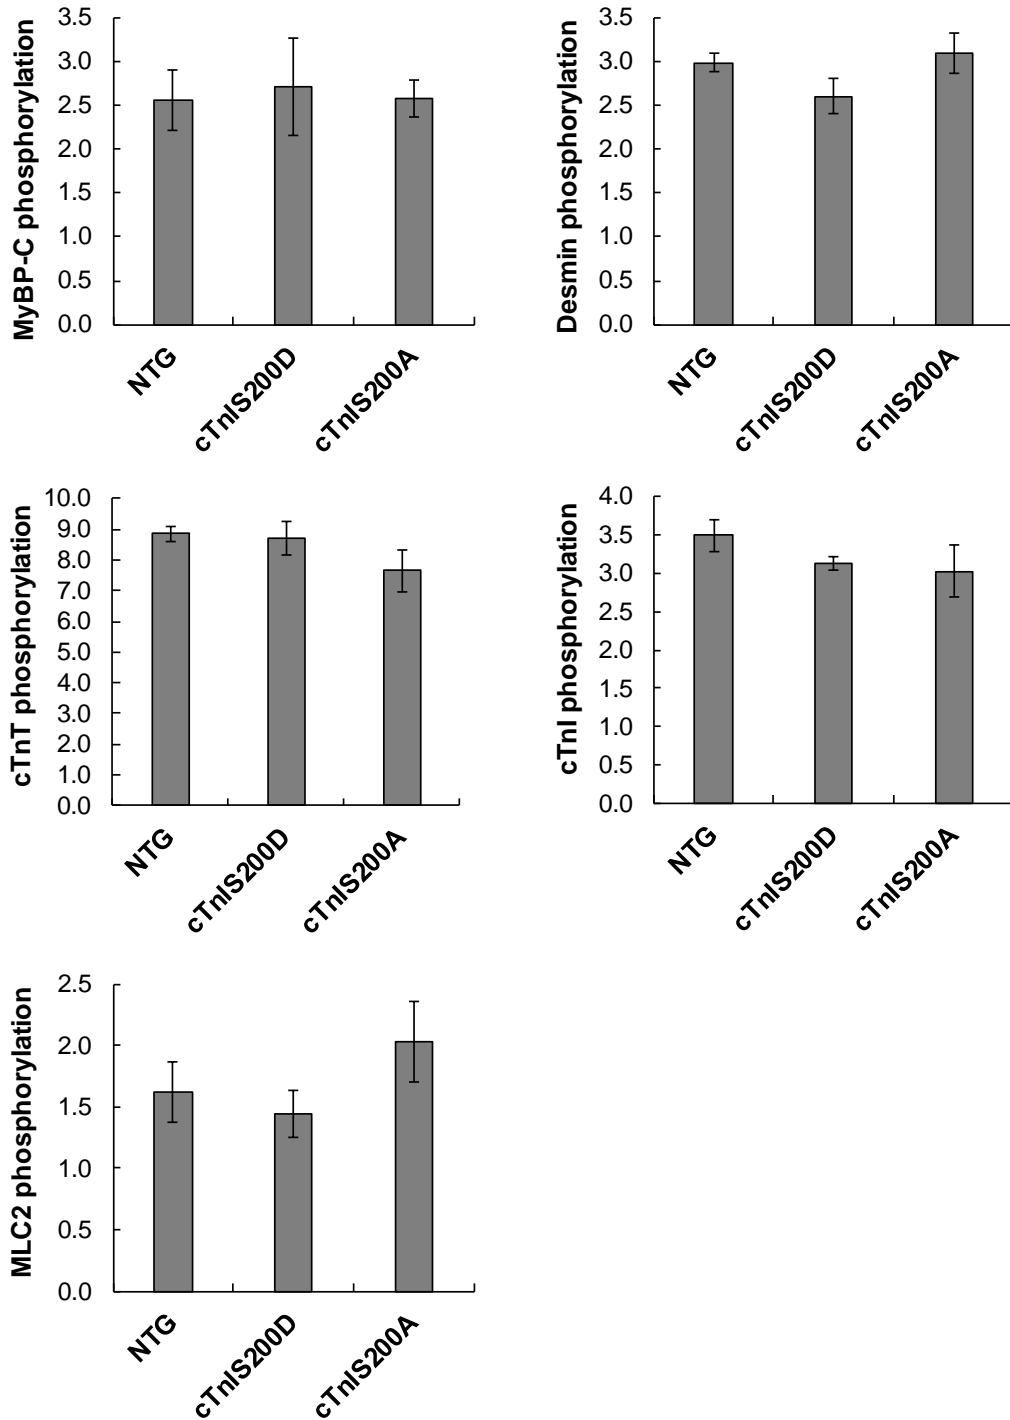

**Supplemental Figure 4.** The overall phosphorylation level of myofilament proteins in mouse hearts of NTG, cTnIS200D, and cTnIS200A, detected with ProQ Diamond staining. n=5. The quantitative data

were analyzed with one-way ANOVA followed by post hoc Tukey's test. The overall phosphorylation level of each protein detected is not significantly different between the three types of mice. Abbreviations: cMyBP-C, cardiac myosin-binding protein-C; cTnT, cardiac troponin T; cTnI, cardiac troponin I, MLC2, myosin light chain 2.
